# Supplementary material for: Ion-Induced Polysaccharide Gelation: Peculiarities of Alginate Egg-Box Association with Different Divalent Cations
Source: MDPI journal article supplement (doi:10.3390/polym15051243), 2023-02-28
Supplement: s1 [file s1]

Supplementary Materials

# Ion-induced polysaccharide gelation: Peculiarities of alginate egg-box association with different divalent cations

Anastasiya O. Makarova <sup>1</sup>, Svetlana R. Derkach <sup>2</sup>, Tahar Khair <sup>3</sup>, Mariia A. Kazantseva <sup>1,4</sup>, Yuriy F. Zuev <sup>1,5,\*</sup> and Olga S. Zueva <sup>3</sup>

<sup>1</sup> Kazan Institute of Biochemistry and Biophysics, FRC Kazan Scientific Center of RAS, Lobachevsky St., 2/31, 420111 Kazan, Russia

<sup>2</sup> Murmansk State Technical University, Sportivnaya str. 13, 183010 Murmansk, Russia

<sup>3</sup> Kazan State Power Engineering University, Krasnoselskaya St. 51, 420066 Kazan, Russia

<sup>4</sup> HSE Tikhonov Moscow Institute of Electronics and Mathematics, Tallinskaya St., 34, 123458, Moscow, Russia

<sup>5</sup> A. Butlerov Chemical Institute, Kazan Federal University, Kremlevskaya St. 18, 420008 Kazan, Russia

\* Correspondence: yufzuev@mail.ru

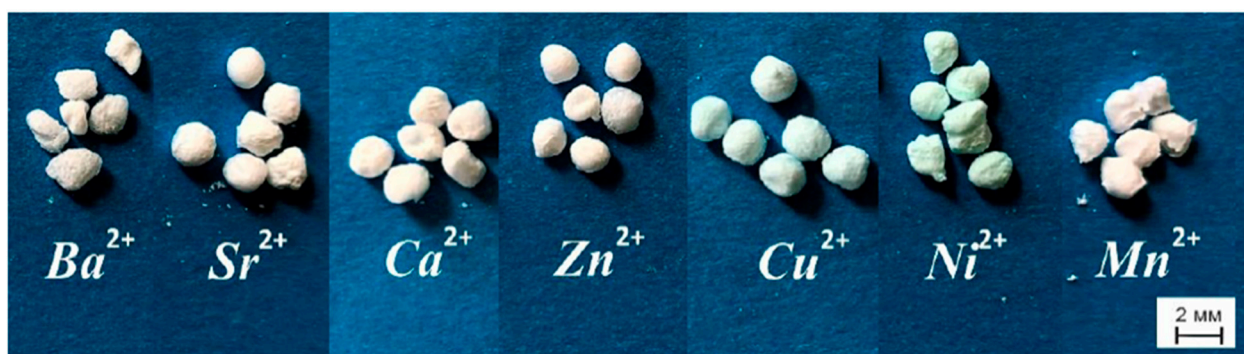

**Figure S1.** Images of alginate microspheres in presence of divalent metal cations.

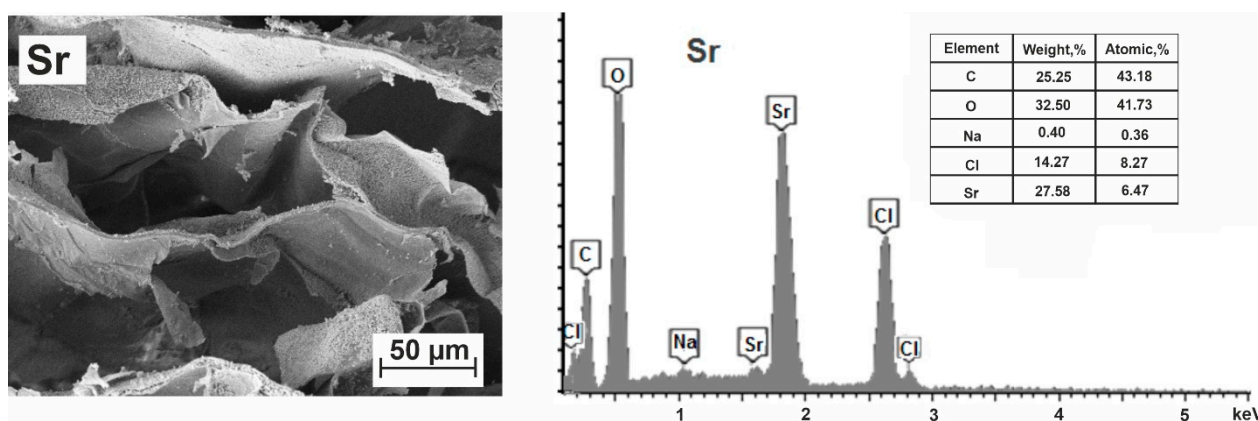

**Figure S2.** SEM image of transverse section of Sr-alginate microsphere and its elemental content.

**Table S1.** Calculation of probabilities of various blocks occurrence along alginate chain having a mannuronic acid to guluronic acid ratio M/G = 1.5.

|   | G  | G  | M  | M  | M  |
|---|----|----|----|----|----|
| G | GG | GG | MG | MG | MG |
| G | GG | GG | MG | MG | MG |
| M | GM | GM | MM | MM | MM |
| M | GM | GM | MM | MM | MM |
| M | GM | GM | MM | MM | MM |

Probabilities of various blocks occurrence.

GG:  $4/25 = 16\%$ ; GM:  $12/25 = 48\%$ ; MM:  $9/25 = 36\%$ .

**Table S2.** Calculation of probabilities of various egg-box cells along alginate dimer having a mannuronic acid to guluronic acid ratio M/G = 1.5.

|    | GG | GG | GG | GG | GM | GM | GM | GM | GM | GM | MG | MM |
|----|----|----|----|----|----|----|----|----|----|----|----|----|----|----|----|----|----|----|----|----|----|----|----|----|----|----|----|
| GG |    |    |    |    |    |    |    |    |    |    |    |    |    |    |    |    |    |    |    |    |    |    |    |    |    |    |    |
| GG |    |    |    |    |    |    |    |    |    |    |    |    |    |    |    |    |    |    |    |    |    |    |    |    |    |    |    |
| GG |    |    |    |    |    |    |    |    |    |    |    |    |    |    |    |    |    |    |    |    |    |    |    |    |    |    |    |
| GG |    |    |    |    |    |    |    |    |    |    |    |    |    |    |    |    |    |    |    |    |    |    |    |    |    |    |    |
| GM |    |    |    |    |    |    |    |    |    |    |    |    |    |    |    |    |    |    |    |    |    |    |    |    |    |    |    |
| GM |    |    |    |    |    |    |    |    |    |    |    |    |    |    |    |    |    |    |    |    |    |    |    |    |    |    |    |
| GM |    |    |    |    |    |    |    |    |    |    |    |    |    |    |    |    |    |    |    |    |    |    |    |    |    |    |    |
| GM |    |    |    |    |    |    |    |    |    |    |    |    |    |    |    |    |    |    |    |    |    |    |    |    |    |    |    |
| GM |    |    |    |    |    |    |    |    |    |    |    |    |    |    |    |    |    |    |    |    |    |    |    |    |    |    |    |
| GM |    |    |    |    |    |    |    |    |    |    |    |    |    |    |    |    |    |    |    |    |    |    |    |    |    |    |    |
| MG |    |    |    |    |    |    |    |    |    |    |    |    |    |    |    |    |    |    |    |    |    |    |    |    |    |    |    |
| MG |    |    |    |    |    |    |    |    |    |    |    |    |    |    |    |    |    |    |    |    |    |    |    |    |    |    |    |
| MG |    |    |    |    |    |    |    |    |    |    |    |    |    |    |    |    |    |    |    |    |    |    |    |    |    |    |    |
| MG |    |    |    |    |    |    |    |    |    |    |    |    |    |    |    |    |    |    |    |    |    |    |    |    |    |    |    |
| MG |    |    |    |    |    |    |    |    |    |    |    |    |    |    |    |    |    |    |    |    |    |    |    |    |    |    |    |
| MG |    |    |    |    |    |    |    |    |    |    |    |    |    |    |    |    |    |    |    |    |    |    |    |    |    |    |    |
| MM |    |    |    |    |    |    |    |    |    |    |    |    |    |    |    |    |    |    |    |    |    |    |    |    |    |    |    |
| MM |    |    |    |    |    |    |    |    |    |    |    |    |    |    |    |    |    |    |    |    |    |    |    |    |    |    |    |
| MM |    |    |    |    |    |    |    |    |    |    |    |    |    |    |    |    |    |    |    |    |    |    |    |    |    |    |    |
| MM |    |    |    |    |    |    |    |    |    |    |    |    |    |    |    |    |    |    |    |    |    |    |    |    |    |    |    |
| MM |    |    |    |    |    |    |    |    |    |    |    |    |    |    |    |    |    |    |    |    |    |    |    |    |    |    |    |
| MM |    |    |    |    |    |    |    |    |    |    |    |    |    |    |    |    |    |    |    |    |    |    |    |    |    |    |    |
| MM |    |    |    |    |    |    |    |    |    |    |    |    |    |    |    |    |    |    |    |    |    |    |    |    |    |    |    |
| MM |    |    |    |    |    |    |    |    |    |    |    |    |    |    |    |    |    |    |    |    |    |    |    |    |    |    |    |
| MM |    |    |    |    |    |    |    |    |    |    |    |    |    |    |    |    |    |    |    |    |    |    |    |    |    |    |    |
| MM |    |    |    |    |    |    |    |    |    |    |    |    |    |    |    |    |    |    |    |    |    |    |    |    |    |    |    |

Probabilities of different egg-box cells.

GG-GG:  $16/625 = 2.56\%$ .

GG-GM:  $96/625 = 15.36\%$ .

GG-MM:  $72/625 = 11.52\%$ .

GM-GM:  $72/625 = 11.52\%$ .

GM-MG:  $72/625 = 11.52\%$ .

GM-MM:  $216/625 = 34.56\%$ .

MM-MM:  $81/625 = 12.96\%$ .
